# Supplementary material
Source: PubMed Central journal article supplement (PMC4955873)
Supplement: supp_gzw026_gzw026supp.pdf [file supp_gzw026_gzw026supp.pdf]

Table S1: PDB IDs of scaffolds used for zinc binding protein design.

|      |      |      |      |      |
|------|------|------|------|------|
| 1A53 | 1GCA | 1LBL | 1Q7F | 1YNA |
| 1ABE | 1GYE | 1LBM | 1QO2 | 2BTM |
| 1B9B | 1H1A | 1LIC | 1RX8 | 2DRI |
| 1BTM | 1HSL | 1M4W | 1S1D | 2FP9 |
| 1CBS | 1I4N | 1NEY | 1SJW | 2FPB |
| 1DC9 | 1ICM | 1OEX | 1SUU | 2FPC |
| 1DL3 | 1ICN | 1OHO | 1THF | 2H13 |
| 1DQX | 1IFC | 1OV7 | 1TML | 2IFB |
| 1E1A | 1IGS | 1OVK | 1TSN | 2IZJ |
| 1EIX | 1JCL | 1P6O | 1V04 | 4FUA |
| 1F5J | 1LBF | 1PVX | 1WDN | 6CPA |

Table SII: Details of crystallization and crystal structure parameters.

| Structure                                        | ZE2 (PDB ID 5K7J)                                                                                          | Spelter (PDB ID <del>XXXX</del> )                                                                          |
|--------------------------------------------------|------------------------------------------------------------------------------------------------------------|------------------------------------------------------------------------------------------------------------|
| Crystallization conditions                       | 0.10 M succinate<br>22% PEG 3350<br>20°C                                                                   | 0.22 M NaI<br>26% PEG 3350<br>4°C                                                                          |
| Space group                                      | P 1 2 <sub>1</sub> 1                                                                                       | P1                                                                                                         |
| Molecules in asymmetric unit                     | 2                                                                                                          | 2                                                                                                          |
| Unit cell parameters                             | a=41.72 Å; b=79.03 Å;<br>c=74.08 Å<br>$\alpha=90.00^\circ$ ; $\beta=95.70^\circ$ ;<br>$\gamma=90.00^\circ$ | a=41.71 Å; b=41.50 Å;<br>c=61.51 Å<br>$\alpha=87.27^\circ$ ; $\beta=83.09^\circ$ ;<br>$\gamma=79.46^\circ$ |
| % solvent                                        | 44.23                                                                                                      | 47.25                                                                                                      |
| Number of unique reflections                     | 91000                                                                                                      | 35638                                                                                                      |
| Number of reflections used in refinement         | 86360                                                                                                      | 33820 (940)                                                                                                |
| Completeness (%)                                 | 94.34 (50.44)                                                                                              | 79.08 (29.34)                                                                                              |
| Correlation coefficient (Fo-Fc <sub>free</sub> ) | 0.945                                                                                                      | 0.940                                                                                                      |
| Resolutions range (Å)                            | 28.62-1.39                                                                                                 | 40.78 – 1.69 (1.73 – 1.69)                                                                                 |
| R <sub>cryst</sub> (%)                           | 18.1 (27.2)                                                                                                | 19.3 (26.5)                                                                                                |
| R <sub>free</sub> (%)                            | 22.1 (30.4)                                                                                                | 23.3 (31.9)                                                                                                |
| Number of atoms                                  | 4045                                                                                                       | 3189                                                                                                       |
| Average B factors (Å <sup>2</sup> )              | 18.755                                                                                                     | 25.0                                                                                                       |
| Bond length RMSD (Å)                             | 0.025                                                                                                      | 0.021                                                                                                      |
| Bond angle RMSD (°)                              | 2.015                                                                                                      | 2.029                                                                                                      |
| Coordinate error from R <sub>free</sub>          | 0.069                                                                                                      | 0.133                                                                                                      |
| Coordinate error from maximum likelihood         | 0.037                                                                                                      | 0.084                                                                                                      |
| Bad rotamers (%)                                 | 2.31                                                                                                       | 0.62                                                                                                       |
| Ramachandran outliers (%)                        | 0                                                                                                          | 0.50                                                                                                       |
| Ramachandran favorables (%)                      | 98.12                                                                                                      | 97.51                                                                                                      |

**Fig. S1:** Sample design models from the third round of design showing overall scaffold structures and zinc site placement. The scaffold types, as referenced in Table I, are a) periplasmic binding protein, b) TIM barrel, c) lipocalin-like, d) jelly roll, e) lysozyme-like, and f) hydrolase-like.

**Fig. S2:** Comparison of designed Spelter zinc binding site (a) with a naturally occurring structural zinc site from the zinc finger protein ZFP57 (PDB ID 4GZN) (b). Note that cysteines in the native site both interact with backbone amide groups.

**Fig. S3:** Sample command lines for RosettaMatch (Phase 3), zinc\_hbond\_graft (Phase 2), and zinc\_hbond\_filter (Phase 3) applications.

**Fig. S4:** Sample match constraints files for a) a three-histidine match with no second-shell residues (Phase 1) and b) a site containing two histidines and one acidic first-shell residue with two second-shell residues (Phase 3).

**A**

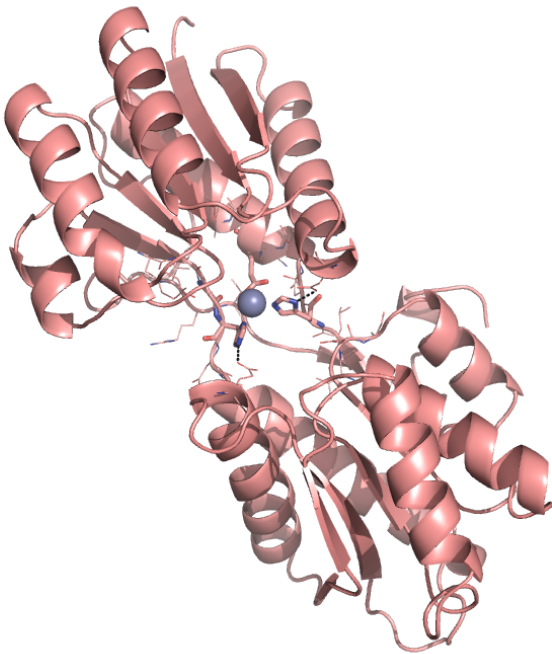

**B**

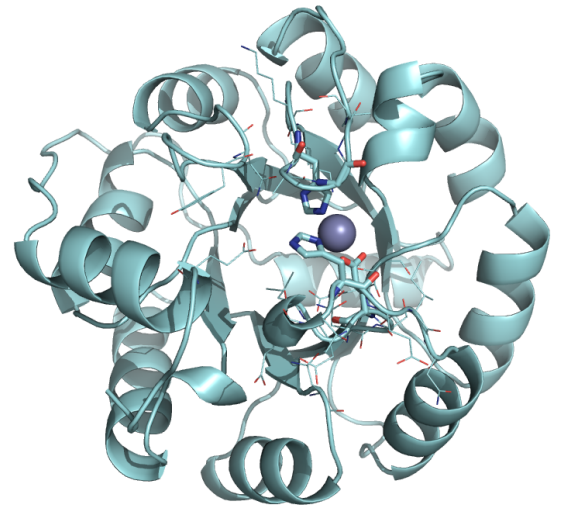

**C**

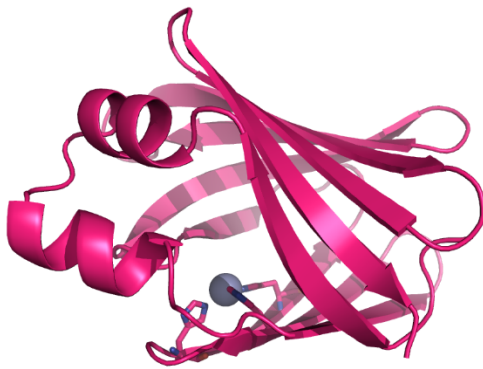

**D**

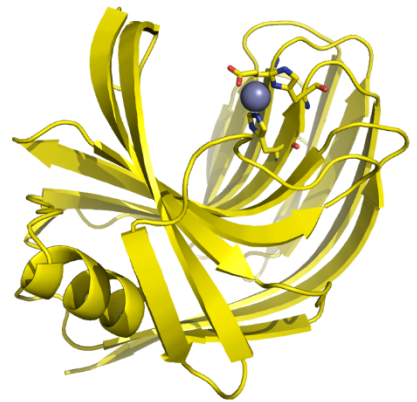

**E**

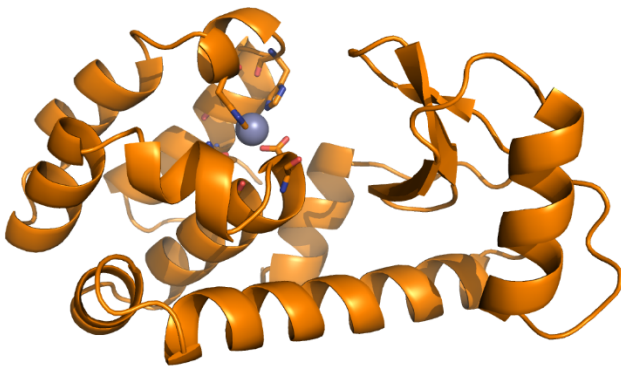

**F**

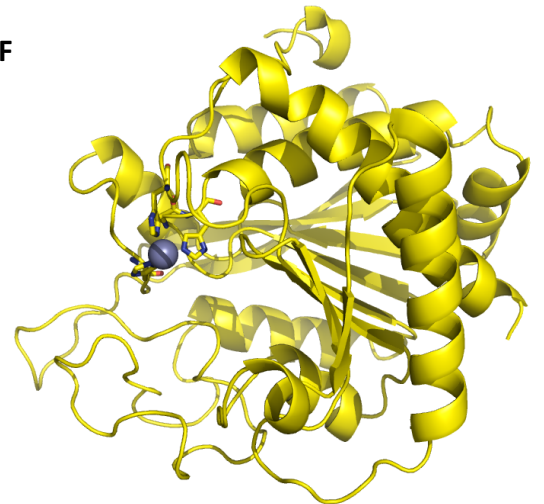

**A**

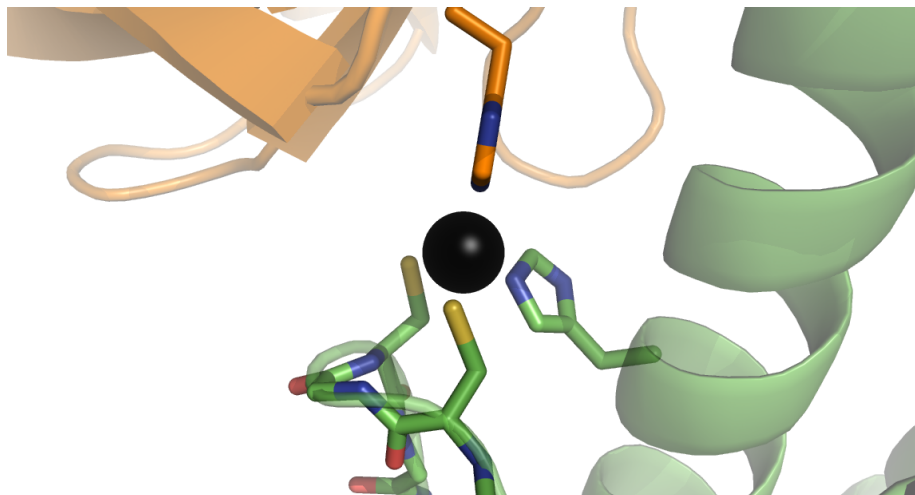

**B**

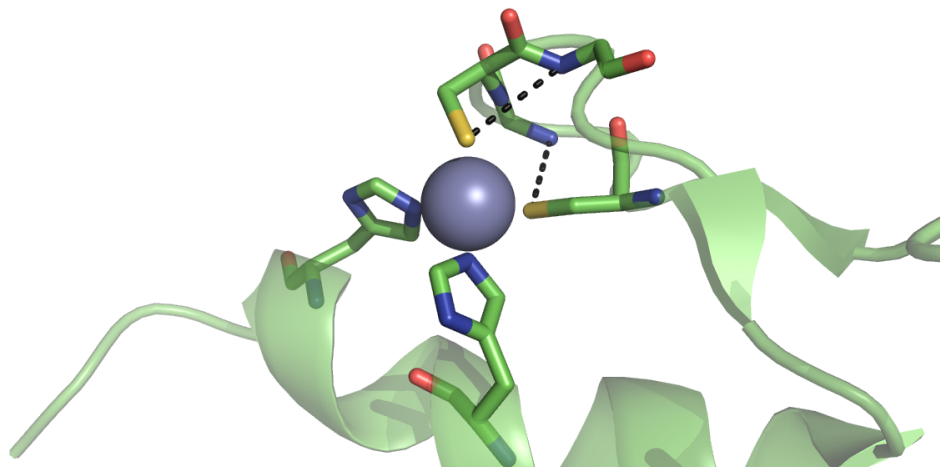

Executable file for RosettaMatch:

/nas02/home/g/u/guffy/Rosetta/main/source/bin/match.default.linuxgccrelease

Sample command line options:

```
-database /nas02/home/g/u/guffy/Rosetta/main/database
-match::lig_name ZNX
-match::scaffold_active_site_residues residue_positions.txt
-match::geometric_constraint_file ../first_his_match.cst
-extra_res_fa ../ZNX.params
-output_matches_per_group 1
-ex1
#-ex2
-use_input_sc
-euclid_bin_size 0.5
-euler_bin_size 30.0
-bump_tolerance 0.5
-match:output_format PDB
-match:consolidate_matches
-match:output_matches_only
-out:file:output_virtual true
-no_optH false
-dun10
-dynamic_grid_refinement
```

Executable file for zinc\_hbond\_graft (grafting procedure for Phase 2 and 3):

/nas02/home/g/u/guffy/Rosetta/main/source/bin/zinc\_hbond\_graft.default.linuxgccrelease

Command line options:

```
-database /nas02/home/g/u/guffy/Rosetta/main/database/
-use_input_sc
-extra_res_fa ../ZNX.params
-preserve_header
-zn_min_pack
-bb_min
-ignore_zero_occupancy false
-mute core.pack.rotamer_set
-scaffold_protein ./1a53_clean3_constrained.pdb
-in:file:s
UM_10015_H109Q82E179Q183H132_2_1a53_clean3_constrained_first_de_ma
tch_1.pdb
-zn_min_pack_cycles 5
-zn_constraint_weight 1.0
-pose_metrics:neighbor_by_distance_cutoff 10.0
```

Executable file for zinc\_hbond\_filter:

/nas02/home/g/u/guffy/Rosetta/main/source/bin/zinc\_hbond\_filter.default.linuxgccrelease

Sample command line options:

-database /nas02/home/g/u/guffy/Rosetta/main/database

-in:file:s

UM\_223\_H74D91E77R73D84\_1\_1abe\_clean3\_constrained\_first\_de\_match\_1\_0  
001.pdb

-hbondres1 91

-hbondres2 73

-scaffold\_protein ../1abe\_clean3\_constrained.pdb

-raw\_scaffold ../1abe\_clean3.pdb

-mute core

-mute basic

-mute protocols

-jd2:no\_output

**A.**

#block 1

CST::BEGIN

TEMPLATE:: ATOM\_MAP: 1 atom\_name: ZN1 C5 C4

TEMPLATE:: ATOM\_MAP: 1 residue3: HIZ

TEMPLATE:: ATOM\_MAP: 2 atom\_type: Nhis

TEMPLATE:: ATOM\_MAP: 2 residue3: HIS

CONSTRAINT:: distanceAB: 2.05 0.15 40.0 0

CONSTRAINT:: angle\_A: 109.5 20.0 40.0 360.

CONSTRAINT:: angle\_B: 125.0 20.0 40.0 360.

CONSTRAINT:: torsion\_A: 60.0 20.0 40.0 120.

CONSTRAINT:: torsion\_AB: 0.0 20.0 40.0 20.0

CONSTRAINT:: torsion\_B: 0.0 20.0 40.0 180.

ALGORITHM\_INFO:: match

CHI\_STRATEGY:: CHI 1 EX\_FOUR\_HALF\_STEP\_STDDEVS

CHI\_STRATEGY:: CHI 2 EX\_ONE\_STDDEV

ALGORITHM\_INFO::END

CST::END

#block 2

CST::BEGIN

TEMPLATE:: ATOM\_MAP: 1 atom\_name: ZN1 C5 C4

TEMPLATE:: ATOM\_MAP: 1 residue3: HIZ

TEMPLATE:: ATOM\_MAP: 2 atom\_type: Nhis

TEMPLATE:: ATOM\_MAP: 2 residue3: HIS

CONSTRAINT:: distanceAB: 2.05 0.15 40.0 0

CONSTRAINT:: angle\_A: 109.5 20.0 40.0 360.

CONSTRAINT:: angle\_B: 125.0 20.0 40.0 360.

CONSTRAINT:: torsion\_A: 60.0 20.0 40.0 120.

CONSTRAINT:: torsion\_AB: 0.0 20.0 40.0 20.0

CONSTRAINT:: torsion\_B: 0.0 20.0 40.0 180.

ALGORITHM\_INFO:: match

CHI\_STRATEGY:: CHI 1 EX\_FOUR\_HALF\_STEP\_STDDEVS

CHI\_STRATEGY:: CHI 2 EX\_ONE\_STDDEV

ALGORITHM\_INFO::END

CST::END

#block 3

CST::BEGIN



```

TEMPLATE::  ATOM_MAP: 1 atom_name: ZN1 C5 C4
TEMPLATE::  ATOM_MAP: 1 residue3:  HIZ

TEMPLATE::  ATOM_MAP: 2 atom_type: Nhis
TEMPLATE::  ATOM_MAP: 2 residue3:  HIS

CONSTRAINT:: distanceAB:   2.05   0.15  40.0   0
CONSTRAINT::   angle_A:   109.5  20.0  40.0  360.
CONSTRAINT::   angle_B:   125.0  20.0  40.0  360.
CONSTRAINT::  torsion_A:    60.0  20.0  40.0  120.
CONSTRAINT::  torsion_AB:   0.0   20.0  40.0  20.0
CONSTRAINT::  torsion_B:   0.0   20.0  40.0  180.

ALGORITHM_INFO:: match
  CHI_STRATEGY:: CHI 1 EX_FOUR_HALF_STEP_STDDEVS
  CHI_STRATEGY:: CHI 2 EX_ONE_STDDEV
ALGORITHM_INFO::END

CST::END

B.
#ZNX coordinated with 3 res
#Res can be His, Asp, or Glu

#First His, primary shell
CST::BEGIN
  TEMPLATE::  ATOM_MAP: 1 atom_name: ZN V2 V3
  TEMPLATE::  ATOM_MAP: 1 residue3:  ZNX

  TEMPLATE::  ATOM_MAP: 2 atom_type: Nhis
  TEMPLATE::  ATOM_MAP: 2 residue3:  HIS

  CONSTRAINT:: distanceAB:   2.10   0.15  40.0   0
  CONSTRAINT::   angle_A:   109.5  20.0  40.0  360.
  CONSTRAINT::   angle_B:   120.0  30.0  40.0  360. 3
  CONSTRAINT::  torsion_A:  -120.0  20.0  40.0  360.
  CONSTRAINT::  torsion_AB:   0.0   20.0  40.0   20.
  CONSTRAINT::  torsion_B:  180.0  20.0  40.0  360. 1

  #ALGORITHM_INFO:: match
    #CHI_STRATEGY:: CHI 1 EX_FOUR_HALF_STEP_STDDEVS
    #CHI_STRATEGY:: CHI 2 EX_ONE_STDDEV
  #ALGORITHM_INFO::END

CST::END

```

#secondary match for CST 1  
VARIABLE\_CST::BEGIN

#backbone oxygen

CST::BEGIN

TEMPLATE:: ATOM\_MAP: 1 atom\_type: Ntrp

TEMPLATE:: ATOM\_MAP: 1 residue1: H

TEMPLATE:: ATOM\_MAP: 2 atom\_type: OCbb

TEMPLATE:: ATOM\_MAP: 2 is\_backbone

TEMPLATE:: ATOM\_MAP: 2 residue1: ACDEFGHIKLMNQRSTVWY

CONSTRAINT:: distanceAB: 2.80 0.50 40.00 0 1

CONSTRAINT:: angle\_A: 125.10 45.00 40.00 360.00 1

CONSTRAINT:: angle\_B: 120.00 45.00 40.00 360.00 1

CONSTRAINT:: torsion\_A: 180.00 45.00 40.00 360.00 1

ALGORITHM\_INFO:: match

IGNORE\_UPSTREAM\_PROTON\_CHI

SECONDARY\_MATCH: UPSTREAM\_CST 1

ALGORITHM\_INFO::END

CST::END

#Asn/Gln oxygen

CST::BEGIN

TEMPLATE:: ATOM\_MAP: 1 atom\_type: Ntrp

TEMPLATE:: ATOM\_MAP: 1 residue1: H

TEMPLATE:: ATOM\_MAP: 2 atom\_type: ONH2,

TEMPLATE:: ATOM\_MAP: 2 residue1: NQ

CONSTRAINT:: distanceAB: 2.80 0.50 40.00 0 1

CONSTRAINT:: angle\_A: 125.10 45.00 40.00 360.00 1

CONSTRAINT:: angle\_B: 120.00 45.00 40.00 360.00 1

CONSTRAINT:: torsion\_A: 180.00 45.00 40.00 360.00 1

ALGORITHM\_INFO:: match

SECONDARY\_MATCH: UPSTREAM\_CST 1

ALGORITHM\_INFO::END

CST::END

#Asp/Glu oxygen

CST::BEGIN

TEMPLATE:: ATOM\_MAP: 1 atom\_type: Ntrp

TEMPLATE:: ATOM\_MAP: 1 residue1: H

TEMPLATE:: ATOM\_MAP: 2 atom\_type: OOC ,

```

TEMPLATE::  ATOM_MAP: 2 residue1: DE

CONSTRAINT:: distanceAB:    2.80    0.50  40.00  0      1
CONSTRAINT::   angle_A:   125.10  45.00  40.00  360.00  1
CONSTRAINT::   angle_B:   120.00  45.00  40.00  360.00  1
CONSTRAINT::  torsion_A:   180.00  45.00  40.00  360.00  1

ALGORITHM_INFO:: match
  IGNORE_UPSTREAM_PROTON_CHI
  SECONDARY_MATCH: UPSTREAM_CST 1
ALGORITHM_INFO::END
CST::END

#Ser/Thr oxygen
CST::BEGIN
  TEMPLATE::  ATOM_MAP: 1 atom_type: Ntrp
  TEMPLATE::  ATOM_MAP: 1 residue1: H

  TEMPLATE::  ATOM_MAP: 2 atom_type: OH ,
  TEMPLATE::  ATOM_MAP: 2 residue1: ST

  CONSTRAINT:: distanceAB:    2.80    0.50  40.00  0      1
  CONSTRAINT::   angle_A:   125.10  45.00  40.00  360.00  1
  CONSTRAINT::   angle_B:   109.00  45.00  40.00  360.00  1
  CONSTRAINT::  torsion_A:   180.00  45.00  40.00  360.00  1

  ALGORITHM_INFO:: match
    IGNORE_UPSTREAM_PROTON_CHI
    SECONDARY_MATCH: UPSTREAM_CST 1
  ALGORITHM_INFO::END
CST::END

VARIABLE_CST::END

#Second residue (His, Asp, or Glu), primary shell
#Histidine
CST::BEGIN
  TEMPLATE::  ATOM_MAP: 1 atom_name: ZN V3 V1
  TEMPLATE::  ATOM_MAP: 1 residue3: ZNX

  TEMPLATE::  ATOM_MAP: 2 atom_type: Nhis
  TEMPLATE::  ATOM_MAP: 2 residue3: HIS

  CONSTRAINT:: distanceAB:    2.10    0.15  40.0  0
  CONSTRAINT::   angle_A:    109.5   20.0  40.0  360.

```

```

CONSTRAINT::  angle_B:  120.0  30.0  40.0  360.  3
CONSTRAINT::  torsion_A: -120.0  20.0  40.0  360.
CONSTRAINT::  torsion_AB:   0.0  20.0  40.0   20.
CONSTRAINT::  torsion_B:  180.0  20.0  40.0  360.  1

#ALGORITHM_INFO:: match
  #CHI_STRATEGY:: CHI 1 EX_FOUR_HALF_STEP_STDDEVS
  #CHI_STRATEGY:: CHI 2 EX_ONE_STDDEV
#ALGORITHM_INFO::END

CST::END

#secondary match for CST 2
VARIABLE_CST::BEGIN

#backbone oxygen
CST::BEGIN
  TEMPLATE::  ATOM_MAP: 1 atom_type: Ntrp
  TEMPLATE::  ATOM_MAP: 1 residuel: H

  TEMPLATE::  ATOM_MAP: 2 atom_type: OCbb
  TEMPLATE::  ATOM_MAP: 2 is_backbone
  TEMPLATE::  ATOM_MAP: 2 residuel: ACDEFGHIKLMNQRSTVWY

  CONSTRAINT:: distanceAB:   2.80   0.50  40.00  0        1
  CONSTRAINT::  angle_A:  125.10  45.00  40.00  360.00  1
  CONSTRAINT::  angle_B:  120.00  45.00  40.00  360.00  1
  CONSTRAINT::  torsion_A: 180.00  45.00  40.00  360.00  1

  ALGORITHM_INFO:: match
    IGNORE_UPSTREAM_PROTON_CHI
    SECONDARY_MATCH: UPSTREAM_CST 3
  ALGORITHM_INFO::END
CST::END

#Asn/Gln oxygen
CST::BEGIN
  TEMPLATE::  ATOM_MAP: 1 atom_type: Ntrp
  TEMPLATE::  ATOM_MAP: 1 residuel: H

  TEMPLATE::  ATOM_MAP: 2 atom_type: ONH2,
  TEMPLATE::  ATOM_MAP: 2 residuel: NQ

  CONSTRAINT:: distanceAB:   2.80   0.50  40.00  0        1
  CONSTRAINT::  angle_A:  125.10  45.00  40.00  360.00  1
  CONSTRAINT::  angle_B:  120.00  45.00  40.00  360.00  1
  CONSTRAINT::  torsion_A: 180.00  45.00  40.00  360.00  1

```

```

ALGORITHM_INFO:: match
  SECONDARY_MATCH: UPSTREAM_CST 3
ALGORITHM_INFO::END
CST::END

#Asp/Glu oxygen
CST::BEGIN
  TEMPLATE::  ATOM_MAP: 1 atom_type: Ntrp
  TEMPLATE::  ATOM_MAP: 1 residue1: H

  TEMPLATE::  ATOM_MAP: 2 atom_type: OOC ,
  TEMPLATE::  ATOM_MAP: 2 residue1: DE

  CONSTRAINT:: distanceAB:  2.80  0.50  40.00  0  1
  CONSTRAINT::  angle_A: 125.10  45.00  40.00  360.00  1
  CONSTRAINT::  angle_B: 120.00  45.00  40.00  360.00  1
  CONSTRAINT::  torsion_A: 180.00  45.00  40.00  360.00  1

  ALGORITHM_INFO:: match
    IGNORE_UPSTREAM_PROTON_CHI
    SECONDARY_MATCH: UPSTREAM_CST 3
  ALGORITHM_INFO::END
CST::END

#Ser/Thr oxygen
CST::BEGIN
  TEMPLATE::  ATOM_MAP: 1 atom_type: Ntrp
  TEMPLATE::  ATOM_MAP: 1 residue1: H

  TEMPLATE::  ATOM_MAP: 2 atom_type: OH ,
  TEMPLATE::  ATOM_MAP: 2 residue1: ST

  CONSTRAINT:: distanceAB:  2.80  0.50  40.00  0  1
  CONSTRAINT::  angle_A: 125.10  45.00  40.00  360.00  1
  CONSTRAINT::  angle_B: 109.00  45.00  40.00  360.00  1
  CONSTRAINT::  torsion_A: 180.00  45.00  40.00  360.00  1

  ALGORITHM_INFO:: match
    IGNORE_UPSTREAM_PROTON_CHI
    SECONDARY_MATCH: UPSTREAM_CST 3
  ALGORITHM_INFO::END
CST::END

VARIABLE_CST::END

```

```

#Third His, primary shell
VARIABLE_CST::BEGIN
CST::BEGIN
  TEMPLATE::    ATOM_MAP: 1 atom_name: ZN V1 V2
  TEMPLATE::    ATOM_MAP: 1 residue3:  ZNX

  TEMPLATE::    ATOM_MAP: 2 atom_type: Nhis
  TEMPLATE::    ATOM_MAP: 2 residue3:  HIS

  CONSTRAINT::  distanceAB:   2.10   0.15  40.0  0
  CONSTRAINT::   angle_A:   109.5   20.0  40.0  360.
  CONSTRAINT::   angle_B:   120.0   30.0  40.0  360. 3
  CONSTRAINT::  torsion_A:  -120.0   20.0  40.0  360.
  CONSTRAINT::  torsion_AB:    0.0   20.0  40.0   20.
  CONSTRAINT::  torsion_B:   180.0   20.0  40.0  360. 1

  #ALGORITHM_INFO:: match
    #CHI_STRATEGY:: CHI 1 EX_FOUR_HALF_STEP_STDDEVS
    #CHI_STRATEGY:: CHI 2 EX_ONE_STDDEV
  #ALGORITHM_INFO::END
CST::END

CST::BEGIN
  TEMPLATE::    ATOM_MAP: 1 atom_name: ZN V1 V2
  TEMPLATE::    ATOM_MAP: 1 residue3:  ZNX

  TEMPLATE::    ATOM_MAP: 2 atom_type: Nhis
  TEMPLATE::    ATOM_MAP: 2 residue3:  HIS

  CONSTRAINT::  distanceAB:   2.10   0.15  40.0  0
  CONSTRAINT::   angle_A:   109.5   20.0  40.0  360.
  CONSTRAINT::   angle_B:   120.0   30.0  40.0  360. 3
  CONSTRAINT::  torsion_A:   120.0   20.0  40.0  360.
  CONSTRAINT::  torsion_AB:    0.0   20.0  40.0   20.
  CONSTRAINT::  torsion_B:   180.0   20.0  40.0  360. 1

  #ALGORITHM_INFO:: match
    #CHI_STRATEGY:: CHI 1 EX_FOUR_HALF_STEP_STDDEVS
    #CHI_STRATEGY:: CHI 2 EX_ONE_STDDEV
  #ALGORITHM_INFO::END

CST::END

#Asp or Glu
#Same distance, same angle about Zn

```

```

#Still Sp2, so angle_B still 120 (keep the same)
#Keep same torsion_A (should be unaffected)
#torsion_b will be torsion about CO bond--still planar, so
either 180 or 0
#Periodicity changes to 180
#torsion_AB is torsion about O-Zn bond; leave it alone
CST::BEGIN
  TEMPLATE::  ATOM_MAP: 1 atom_name: ZN V1 V2
  TEMPLATE::  ATOM_MAP: 1 residue3:  ZNX

  TEMPLATE::  ATOM_MAP: 2 atom_type: OOC
  TEMPLATE::  ATOM_MAP: 2 residue1:  DE

  CONSTRAINT:: distanceAB:  2.10  0.15  40.0  0
  CONSTRAINT::  angle_A:   109.5  20.0  40.0  360.
  CONSTRAINT::  angle_B:   120.0  30.0  40.0  360. 3
  CONSTRAINT::  torsion_A:  -120.0  20.0  40.0  360.
  CONSTRAINT::  torsion_AB:   0.0  20.0  40.0  20.
  CONSTRAINT::  torsion_B:  180.0  20.0  40.0  180. 1

  #ALGORITHM_INFO:: match
  #CHI_STRATEGY:: CHI 1 EX_FOUR_HALF_STEP_STDDEVS
  #CHI_STRATEGY:: CHI 2 EX_ONE_STDDEV
  #ALGORITHM_INFO::END
CST::END

```

```

#Asp or Glu
#Same distance, same angle about Zn
#Still Sp2, so angle_B still 120 (keep the same)
#Keep same torsion_A (should be unaffected)
#torsion_b will be torsion about CO bond--still planar, so
either 180 or 0
#Periodicity changes to 180
#torsion_AB is torsion about O-Zn bond; leave it alone
CST::BEGIN
  TEMPLATE::  ATOM_MAP: 1 atom_name: ZN V1 V2
  TEMPLATE::  ATOM_MAP: 1 residue3:  ZNX

  TEMPLATE::  ATOM_MAP: 2 atom_type: OOC
  TEMPLATE::  ATOM_MAP: 2 residue1:  DE

  CONSTRAINT:: distanceAB:  2.10  0.15  40.0  0
  CONSTRAINT::  angle_A:   109.5  20.0  40.0  360.
  CONSTRAINT::  angle_B:   120.0  30.0  40.0  360. 3
  CONSTRAINT::  torsion_A:   120.0  20.0  40.0  360.
  CONSTRAINT::  torsion_AB:   0.0  20.0  40.0  20.

```

```
CONSTRAINT:: torsion_B: 180.0 20.0 40.0 180. 1

#ALGORITHM_INFO:: match
  #CHI_STRATEGY:: CHI 1 EX_FOUR_HALF_STEP_STDDEVS
  #CHI_STRATEGY:: CHI 2 EX_ONE_STDDEV
#ALGORITHM_INFO::END
CST::END

VARIABLE_CST::END
```
